# Supplementary material for: A novel reusable superhydrophilic NiO/Ni mesh produced by a facile fabrication method for superior oil/water separation
Source: Royal Society of Chemistry journal article supplement (doi:10.1039/c7ta01987d), 2017-01-01
Supplement: c7ta01987d1.pdf [file c7ta01987d1.pdf]

# Journal of Materials Chemistry A

## Supporting Information

### **A novel reusable superhydrophilic NiO/Ni mesh produced by a facile fabrication method for oil/water separation**

*Zhenwei Yu,<sup>†a</sup> Frank F. Yun,<sup>†a</sup> Shixue Dou,<sup>a</sup> Kesong Liu,<sup>b</sup> Lei Jiang<sup>\*b,c</sup> and Xiaolin Wang<sup>\*a</sup>*

#### **Movie S1: Oil/water separation process using the neat Ni mesh**

- (1) Water and paraffin oil mixture.
- (2) Paraffin oil was used as typical oil and dyed with oil atrovirens dye for clear observation.

#### **Movie S2: Oil/water separation process using the NiO mesh**

- (1) Water and paraffin oil mixture.
- (2) Paraffin oil was used as typical oil and dyed with oil atrovirens dye for clear observation.

#### **Movie S3: Oil/water separation process using the NiO mesh**

- (1) Water and vegetable oil mixture with salt and sugar.
- (2) After burning the contaminated NiO mesh.
